# Supplementary material
Source: Springer Nature journal article supplement (https://www.springermedizin.de/resource/supplementary/13049_2008_9_MOESM2_ESM.pdf/9665732)

**Parameter**

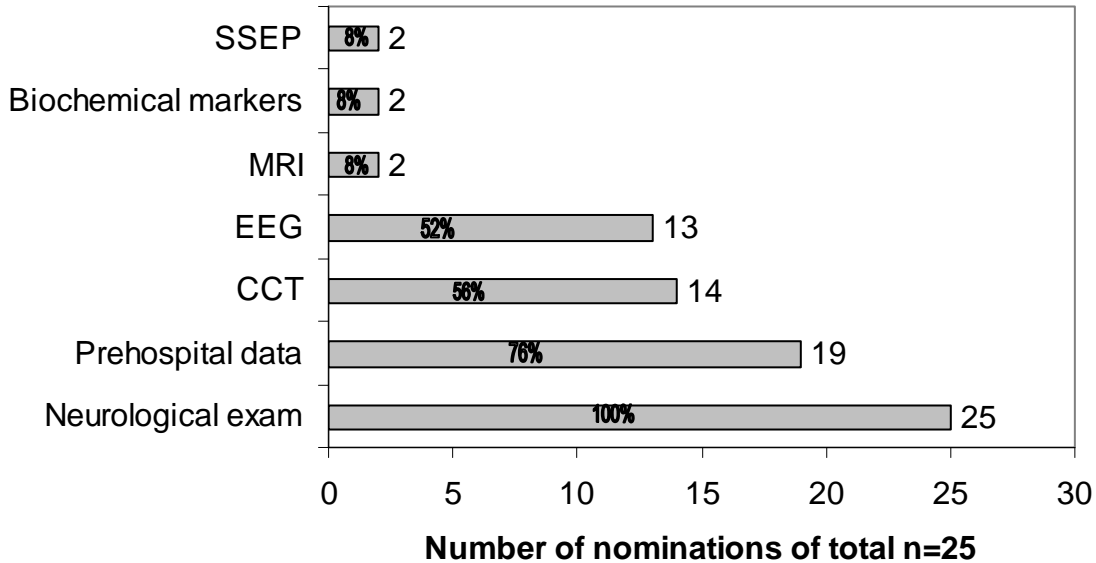

Supplement: MOESM2 [file 9665732]
